# Supplementary material for: A pH-neutral bioactive glass empowered gelatin–chitosan–sodium phytate composite scaffold for skull defect repair
Source: Royal Society of Chemistry journal article supplement (doi:10.1039/d3tb01603j), 2023-01-01
Supplement: d3tb01603j1.pdf [file d3tb01603j1.pdf]

## Supporting Information

# A pH-neutral bioactive glass empowered gelatin-chitosan composite scaffold for skull defect repairing

Bin Zhu<sup>†a</sup>, Yu Liu<sup>†b</sup>, Yanlei Zhao<sup>c</sup>, Xinyu Dou<sup>b</sup>, Linbang Wang<sup>b</sup>, Shuyuan Min<sup>b</sup>, Xiaoguang Liu<sup>\*b</sup> and Dong Qiu<sup>\*dc</sup>

<sup>a</sup> *Department of Orthopaedics, Beijing Friendship Hospital, Capital Medical University, Beijing, 100050, P.R. China.*

<sup>b</sup> *Department of Orthopaedics, Peking University Third Hospital, Beijing, 100191, P.R. China.*

<sup>c</sup> *College of Chemistry, Beijing Normal University, Beijing, 100875, P.R. China.*

<sup>d</sup> *Beijing National Laboratory for Molecular Sciences, State Key Laboratory of Polymer Physics and Chemistry CAS Research/Education Center for Excellence in Molecular Sciences, Institute of Chemistry, Chinese Academy of Sciences, Beijing 100190, P.R. China.*

<sup>e</sup> *School of Chemical Sciences, University of Chinese Academy of Sciences, Beijing 100190, P.R. China.*

<sup>†</sup> Bin Zhu and Yu Liu contributed equally to this work and should be considered co-first authors.

\* Corresponding author. E-mail addresses: xgliuspine@sina.com (Xiaoguang Liu),  
dqiu@iccas.ac.cn (Dong Qiu)

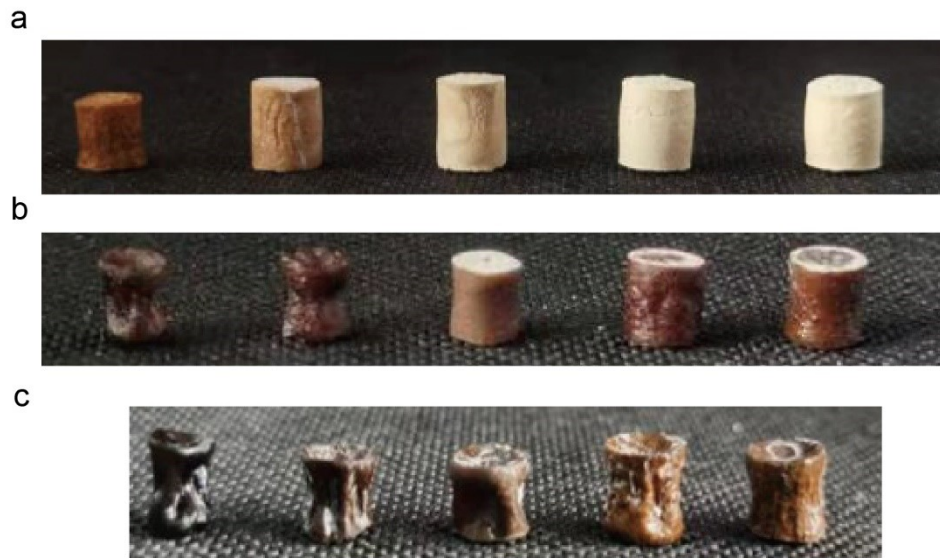

Figure S1. Images of composite scaffolds prepared with different cross-linking methods and different amounts of PSC. a) 1wt% glutaraldehyde solution cross-linked. b) 20wt% sodium phytate solution cross-linked. c) 1wt% glutaraldehyde and 20wt% sodium phytate mixed solution co-cross-linked. The PSC dosages from left to right were 0, 10, 20, 30, and 40wt% respectively.

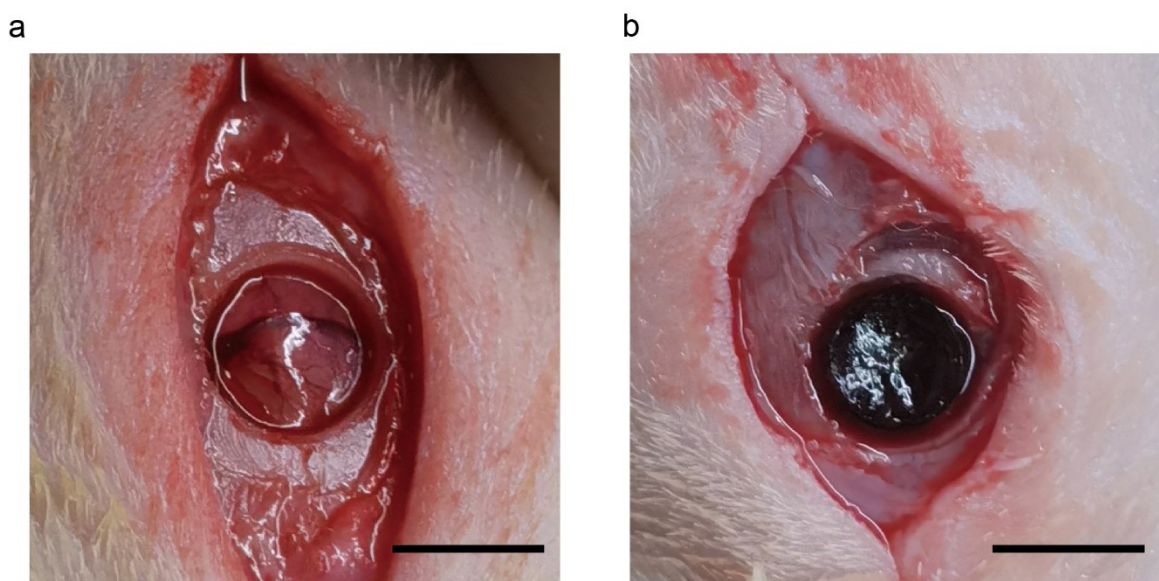

Figure S2. Images of rat skull defect model of rat. a) the full-thickness skull defect at the top of the skull. b) Composite scaffolds were implanted to repair the defect. Scale bar: 5mm.
